# Supplementary material for: Mutated genes, pathways and processes in tumours
Source: PubMed Central journal article supplement — EMBO Rep. 2010 Sep 17;11(10):805–10. doi: 10.1038/embor.2010.133 (PMC2948187; doi:10.1038/embor.2010.133), 2010-09-17
Supplement: embor2010133-s1.pdf [file embor2010133-s1.pdf]

## **Supplementary Information**

**Supplementary Table 1. Mutated gene data.** For each of the mutated genes, the associated tumour type and the source of information (reference database or published article) are given, as well as the gene annotations in Kegg (Kanehisa et al, 2008), Reactome (Matthews et al, 2009), Biocarta (<http://www.biocarta.com/>), Gene Ontology Biological Process (Ashburner et al, 2000) and Interpro (Hunter et al, 2009).

**Supplementary Table 2.** Pathways, processes and protein domains containing a significant number of mutated genes in the different tumour types. All results with Q-values lower than 0.1 are shown.

**Supplementary Methods.** Complementary information for the statistical test and online pathways and processes resources.

## Supplementary Methods

### Introduction

The identification of pathways and processes containing more mutated genes than expected by chance in each tumour type has been done with a Fisher statistical test. This test implies the definition of a statistical background to identify significant pathways/processes while taking into account how many pathway/process genes have been screened for mutations in each tumour type. However, the dataset of 5,272 mutated genes have been created by combining many information sources (e.g., high-throughput resequencing data, literature data catalogued in databases), and is very heterogeneous. While analyzing the significance of genome-wide tumour resequencing studies is easy since all of them explore the full genome, low-scale or individual resequencing experiments are very different : These experiments are designed to evaluate a few genes and they report only positive results. In this case, the size of the dataset that was assessed is undefined. To complicate things further a number of datasets are of intermediate nature (for example the resequencing studies of gene families, such as kinases (Greenman et al, 2007)).

To gain confidence in the significance of the statistical enrichment results, we designed the following experiment to compare the results obtained while analysing 2 different large-scale resequencing studies in the same tumour type.

### Parallel pathway/process statistical enrichment for 2 large-scale colorectal resequencing studies

The following experiment was designed to estimate the differences in pathways/processes associated to a given tumour-type while computing the enrichment analysis in parallel for 2 large-scale resequencing studies, each associated to its proper statistical background (complete set of genes that have been screened for mutations). To our knowledge, no tumour type have been screen twice for the same dataset of genes (neither screened twice genome-wide). Hence, we chose to compare mutated genes identified in colorectal tumours 1) by a kinase resequencing study (Greenman et al, 2007) and 2) by a genome-wide resequencing study (Wood et al, 2007). Mutated gene data extracted from literature and small-scale studies were added to these 2 datasets identically (Wang et al, 2004; Bardelli et al, 2003; Forbes et al, 2008; Thomas et al, 2007; Futreal et al, 2004; Hamosh et al, 2005). We challenged pathways and processes extracted from Biocarta (<http://www.biocarta.com/>), Kegg (Kanehisa et al, 2008) and Reactome (Matthews et al, 2009) (an integrated display of these pathways/processes can be found in

the HPD database (Chowbina et al, 2009)). Few significant results were obtained with the previously defined Q-value threshold of 0.01 (see supplementary Method Tables below). However, comparing the ranked list of obtained pathways, we observed that the first bin (all results were divided in 5 bins of equal sizes, the first bins of each database are presented in supplementary Method Tables A, B and C) encompassing the lowest Q-values, contain more common pathways/processes than expected by chance ( $P\text{-value} < 0.003$ ) for the 3 pathway databases (P-value score estimated as the number of common pathways/processes obtained after 10,000 bin randomisation).

Furthermore, the real analysis, obtained after combining the large-scale datasets, and defining the union of screened genes as a background, mainly identify pathway/process that are also retrieved in the separated parallel analyses (supplementary Method Tables).

Our conclusion is that the pathways/processes obtained for the parallel analyses of 2 large-scale colorectal cancer resequencing studies, would not give many significant results when considered separately, even if they are comparable and point to very similar results. Merging the mutated genes data with different backgrounds does not bias the results (the observations are essentially the same in the different sources), and positively contributes to give them an additional statistical significance.

Furthermore, this experiment also indicated that the mutated genes data coming from literature databases and low-scale studies, that were added identically to the 2 datasets for the parallel analysis, and that are less prone to false-positives, contribute greatly to the discovery of tumour-associated pathways and processes.

Beyond this specific issue we would like to point out that the system and the type of analysis presented here will evolve towards the inclusion of larger data sets with all the cancer genome projects in course: Time will make the system increasingly robust and supported by homogeneous large-scale studies. The statistical significance assessment will be not only easier, but also closer to what is anticipated in this initial publication. Furthermore, we can also imagine in the future integrating different -omics data to study cancer-related alterations of cellular pathways (Balestrieri et al, 2009).

## **Supplementary Method Table**

For each database, the pathway/processes in the first bin are presented (all results were divided in 5 bins of equal sizes). Pathways/process retrieved in the first bins in the 2 parallel experiments, as well as in the real experiment presented in the paper, are coloured in blue

| A) Biocarta                            |              |                                              |                  | Common Pathways/Processes |          |
|----------------------------------------|--------------|----------------------------------------------|------------------|---------------------------|----------|
| Genome-wide resequencing (Wood et al.) | Wood q-value | Kinase-family resequencing (Greenman et al.) | Greenman q-value | 21/31                     | P<0.0001 |
| h_p53hypoxiaPathway                    | 0.020        | h_p53hypoxiaPathway                          | 0.330            |                           |          |
| h_tgfbPathway                          | 0.020        | h_ctcfPathway                                | 0.330            |                           |          |
| h_mTORPathway                          | 0.050        | h_trkaPathway                                | 0.330            |                           |          |
| h_ctcfPathway                          | 0.070        | h_chemicalPathway                            | 0.380            |                           |          |
| h_eif4Pathway                          | 0.090        | h_cblPathway                                 | 0.380            |                           |          |
| h_her2Pathway                          | 0.090        | h_cardiacegfPathway                          | 0.420            |                           |          |
| h_igf1mtorpathway                      | 0.100        | h_tffPathway                                 | 0.580            |                           |          |
| h_trkaPathway                          | 0.120        | h_vegfPathway                                | 0.600            |                           |          |
| h_crebPathway                          | 0.120        | h_ps1Pathway                                 | 0.600            |                           |          |
| h_pitx2Pathway                         | 0.120        | h_cdc42racPathway                            | 0.600            |                           |          |
| h_cblPathway                           | 0.120        | h_mTORPathway                                | 0.600            |                           |          |
| h_egfPathway                           | 0.150        | h_egfPathway                                 | 0.600            |                           |          |
| h_alkPathway                           | 0.180        | h_ifnaPathway                                | 0.600            |                           |          |
| h_gsk3Pathway                          | 0.190        | h_plcPathway                                 | 0.600            |                           |          |
| h_ps1Pathway                           | 0.220        | h_erbB4pathway                               | 0.600            |                           |          |
| h_HBxPathway                           | 0.220        | h_telPathway                                 | 0.600            |                           |          |
| h_tffPathway                           | 0.250        | h_RELAPathway                                | 0.600            |                           |          |
| h_vegfPathway                          | 0.250        | h_edg1Pathway                                | 0.600            |                           |          |
| h_shhPathway                           | 0.250        | h_tgfbPathway                                | 0.600            |                           |          |
| h_cdc42racPathway                      | 0.250        | h_bcellsurvivalPathway                       | 0.600            |                           |          |
| h_no1Pathway                           | 0.290        | h_alkPathway                                 | 0.650            |                           |          |
| h_igf1rPathway                         | 0.290        | h_cell2cellPathway                           | 0.680            |                           |          |
| h_cell2cellPathway                     | 0.290        | h_eif4Pathway                                | 0.680            |                           |          |
| h_ptdinsPathway                        | 0.310        | h_arfPathway                                 | 0.680            |                           |          |
| h_arfPathway                           | 0.310        | h_no1Pathway                                 | 0.680            |                           |          |
| h_ptenPathway                          | 0.310        | h_pitx2Pathway                               | 0.700            |                           |          |
| h_telPathway                           | 0.310        | h_igf1mtorpathway                            | 0.850            |                           |          |
| h_il4Pathway                           | 0.310        | h_hesPathway                                 | 0.850            |                           |          |
| h_erkPathway                           | 0.360        | h_mef2dPathway                               | 0.850            |                           |          |
| h_edg1Pathway                          | 0.410        | h_tob1Pathway                                | 0.850            |                           |          |
| h_akapCentrosomePathway                | 0.410        | h_her2Pathway                                | 0.870            |                           |          |

Statistical significant results for the merged datasets (results presented in the manuscript)

|                     |                                              |      |
|---------------------|----------------------------------------------|------|
| h_trkaPathway       | Trka Receptor Signaling Pathway              | 0.01 |
| h_p53hypoxiaPathway | Hypoxia and p53 in the Cardiovascular system | 0.01 |

| B) Kegg                                |              |                                              |                  | Common Pathways/Processes |          |
|----------------------------------------|--------------|----------------------------------------------|------------------|---------------------------|----------|
| Genome-wide resequencing (Wood et al.) | Wood q-value | Kinase-family resequencing (Greenman et al.) | Greenman q-value | 12/15                     | P<0.0001 |
| hsa05210                               | 0.000        | hsa05210                                     | 0.000            |                           |          |
| hsa05213                               | 0.000        | hsa05213                                     | 0.002            |                           |          |
| hsa05218                               | 0.000        | hsa05214                                     | 0.003            |                           |          |
| hsa05212                               | 0.000        | hsa05218                                     | 0.005            |                           |          |
| hsa05215                               | 0.000        | hsa05212                                     | 0.005            |                           |          |
| hsa04520                               | 0.000        | hsa04012                                     | 0.006            |                           |          |
| hsa05216                               | 0.000        | hsa05215                                     | 0.014            |                           |          |
| hsa05214                               | 0.000        | hsa05211                                     | 0.023            |                           |          |
| hsa05223                               | 0.000        | hsa05219                                     | 0.031            |                           |          |
| hsa05219                               | 0.000        | hsa04320                                     | 0.032            |                           |          |
| hsa04510                               | 0.000        | hsa04510                                     | 0.040            |                           |          |
| hsa04012                               | 0.000        | hsa05223                                     | 0.043            |                           |          |
| hsa04320                               | 0.000        | hsa04070                                     | 0.064            |                           |          |
| hsa05220                               | 0.000        | hsa04530                                     | 0.135            |                           |          |
| hsa05221                               | 0.000        | hsa05220                                     | 0.140            |                           |          |

Statistical significant results for the merged datasets (results presented in the manuscript)

|          |                                   |          |
|----------|-----------------------------------|----------|
| hsa05210 | Colorectal cancer                 | 6.7E-013 |
| hsa05213 | Endometrial cancer                | 5.4E-010 |
| hsa04012 | ErbB signaling pathway            | 4.1E-009 |
| hsa05214 | Glioma                            | 1.5E-008 |
| hsa05212 | Pancreatic cancer                 | 1.4E-007 |
| hsa05215 | Prostate cancer                   | 3.7E-007 |
| hsa05218 | Melanoma                          | 6.5E-007 |
| hsa04510 | Focal adhesion                    | 1.9E-006 |
| hsa05223 | Non-small cell lung cancer        | 2.0E-006 |
| hsa05221 | Acute myeloid leukemia            | 3.2E-006 |
| hsa05219 | Bladder cancer                    | 1.1E-005 |
| hsa05216 | Thyroid cancer                    | 2.5E-005 |
| hsa04520 | Adherens junction                 | 2.5E-005 |
| hsa05211 | Renal cell carcinoma              | 1.6E-004 |
| hsa05220 | Chronic myeloid leukemia          | 1.7E-004 |
| hsa04360 | Axon guidance                     | 2.9E-004 |
| hsa04912 | GnRH signaling pathway            | 2.9E-004 |
| hsa04320 | Dorso-ventral axis formation      | 2.9E-004 |
| hsa04730 | Long-term depression              | 4.4E-004 |
| hsa04370 | VEGF signaling pathway            | 5.6E-004 |
| hsa04010 | MAPK signaling pathway            | 6.7E-004 |
| hsa04540 | Gap junction                      | 9.6E-004 |
| hsa04930 | Type II diabetes mellitus         | 9.6E-004 |
| hsa04916 | Melanogenesis                     | 1.0E-003 |
| hsa04720 | Long-term potentiation            | 1.0E-003 |
| hsa04664 | Fc epsilon RI signaling pathway   | 1.0E-003 |
| hsa05217 | Basal cell carcinoma              | 1.7E-003 |
| hsa04920 | Adipocytokine signaling pathway   | 2.1E-003 |
| hsa04150 | mTOR signaling pathway            | 2.2E-003 |
| hsa04910 | Insulin signaling pathway         | 4.1E-003 |
| hsa04662 | B cell receptor signaling pathway | 4.9E-003 |
| hsa05222 | Small cell lung cancer            | 5.0E-003 |
| hsa04310 | Wnt signaling pathway             | 5.8E-003 |

| C) Reactome                            |              |                                              |                  | Common Pathways/Processes |         |
|----------------------------------------|--------------|----------------------------------------------|------------------|---------------------------|---------|
| Genome-wide resequencing (Wood et al.) | Wood q-value | Kinase-family resequencing (Greenman et al.) | Greenman q-value | 04/07                     | P<0.003 |
| REACT_9417                             | 0.01         | REACT_13685                                  | 0.08             |                           |         |
| REACT_498                              | 0.01         | REACT_16888                                  | 0.37             |                           |         |
| REACT_16888                            | 0.03         | REACT_9417                                   | 0.37             |                           |         |
| REACT_11061                            | 0.03         | REACT_604                                    | 0.39             |                           |         |
| REACT_14797                            | 0.05         | REACT_1505                                   | 0.46             |                           |         |
| REACT_6844                             | 0.06         | REACT_152                                    | 0.46             |                           |         |
| REACT_13685                            | 0.25         | REACT_498                                    | 0.46             |                           |         |

Statistical significant results for the merged datasets (results presented in the manuscript)

|             |                               |      |
|-------------|-------------------------------|------|
| REACT_498   | Signaling by Insulin receptor | 0    |
| REACT_11061 | Signalling by NGF             | 0.01 |

## Pathways, processes and other network-related resources

### Pathways and Process databases

Kegg (Kanehisa et al, 2008)

<http://www.genome.jp/kegg/>

Reactome (Matthews et al, 2009)

<http://www.reactome.org/>

Biocarta

<http://www.biocarta.com/genes/index.asp>

Gene Ontology (Ashburner et al, 2000)

<http://www.geneontology.org/>

BioPax

<http://www.biopax.org/>

HPD (Chowbina et al, 2009)

<http://discern.uits.iu.edu:8340/HPD/help.php>

### Protein interaction databases

HPRD (Peri et al, 2003)

<http://www.hprd.org/>

Intact (Hermjakob et al, 2004)

<http://www.ebi.ac.uk/intact/main.xhtml>

## References

- Ashburner M, Ball CA, Blake JA, Botstein D, Butler H, Cherry JM, Davis AP, Dolinski K, Dwight SS, Eppig JT, Harris MA, Hill DP, Issel-Tarver L, Kasarskis A, Lewis S, Matese JC, Richardson JE, Ringwald M, Rubin GM & Sherlock G (2000) Gene ontology: tool for the unification of biology. The Gene Ontology Consortium. *Nat. Genet* **25**: 25-29
- Balestrieri C, Alberghina L, Vanoni M & Chiaradonna F (2009) Data recovery and integration from public databases uncovers transformation-specific transcriptional downregulation of cAMP-PKA pathway-encoding genes. *BMC Bioinformatics* **10 Suppl 12**: S1
- Bardelli A, Parsons DW, Silliman N, Ptak J, Szabo S, Saha S, Markowitz S, Willson JKV, Parmigiani G, Kinzler KW, Vogelstein B & Velculescu VE (2003) Mutational analysis of the tyrosine kinome in colorectal cancers. *Science* **300**: 949

- Chowbina SR, Wu X, Zhang F, Li PM, Pandey R, Kasamsetty HN & Chen JY (2009) HPD: an online integrated human pathway database enabling systems biology studies. *BMC Bioinformatics* **10 Suppl 11**: S5
- Forbes SA, Bhamra G, Bamford S, Dawson E, Kok C, Clements J, Menzies A, Teague JW, Futreal PA & Stratton MR (2008) The Catalogue of Somatic Mutations in Cancer (COSMIC). *Curr Protoc Hum Genet* **Chapter 10**: Unit 10.11
- Futreal PA, Coin L, Marshall M, Down T, Hubbard T, Wooster R, Rahman N & Stratton MR (2004) A census of human cancer genes. *Nat Rev Cancer* **4**: 177-83
- Greenman C, Stephens P, Smith R, Dalgliesh GL, Hunter C, Bignell G, Davies H, Teague J, Butler A, Stevens C, Edkins S, O'Meara S, Vastrik I, Schmidt EE, Avis T, Barthorpe S, Bhamra G, Buck G, Choudhury B, Clements J et al (2007) Patterns of somatic mutation in human cancer genomes. *Nature* **446**: 153-8
- Hamosh A, Scott AF, Amberger JS, Bocchini CA & McKusick VA (2005) Online Mendelian Inheritance in Man (OMIM), a knowledgebase of human genes and genetic disorders. *Nucleic Acids Res* **33**: D514-7
- Hermjakob H, Montecchi-Palazzi L, Lewington C, Mudali S, Kerrien S, Orchard S, Vingron M, Roechert B, Roepstorff P, Valencia A, Margalit H, Armstrong J, Bairoch A, Cesareni G, Sherman D & Apweiler R (2004) IntAct: an open source molecular interaction database. *Nucleic Acids Res* **32**: D452-455
- Kanehisa M, Araki M, Goto S, Hattori M, Hirakawa M, Itoh M, Katayama T, Kawashima S, Okuda S, Tokimatsu T & Yamanishi Y (2008) KEGG for linking genomes to life and the environment. *Nucleic Acids Res* **36**: D480-4. <http://www.genome.jp/kegg/>
- Matthews L, Gopinath G, Gillespie M, Caudy M, Croft D, de Bono B, Garapati P, Hemish J, Hermjakob H, Jassal B, Kanapin A, Lewis S, Mahajan S, May B, Schmidt E, Vastrik I, Wu G, Birney E, Stein L & D'Eustachio P (2009) Reactome knowledgebase of human biological pathways and processes. *Nucleic Acids Res* **37**: D619-22. <http://www.reactome.org/>
- Peri S, Navarro JD, Amanchy R, Kristiansen TZ, Jonnalagadda CK, Surendranath V, Niranjan V, Muthusamy B, Gandhi TKB, Gronborg M, Ibarrola N, Deshpande N, Shanker K, Shivashankar HN, Rashmi BP, Ramya MA, Zhao Z, Chandrika KN, Padma N, Harsha HC et al (2003) Development of human protein reference database as an initial platform for approaching systems biology in humans. *Genome Res* **13**: 2363-2371
- Thomas RK, Baker AC, DeBiasi RM, Winckler W, Laframboise T, Lin WM, Wang M, Feng W, Zander T, MacConaill L, Lee JC, Nicoletti R, Hatton C, Goyette M, Girard L, Majmudar K, Ziaugra L, Wong K, Gabriel S, Beroukheim R et al (2007) High-throughput oncogene mutation profiling in human cancer. *Nat Genet* **39**: 347-51
- Wang Z, Shen D, Parsons DW, Bardelli A, Sager J, Szabo S, Ptak J, Silliman N, Peters BA, van der Heijden MS, Parmigiani G, Yan H, Wang T, Riggins G, Powell SM, Willson JKV, Markowitz S,

Kinzler KW, Vogelstein B & Velculescu VE (2004) Mutational analysis of the tyrosine phosphatome in colorectal cancers. *Science* **304**: 1164-6

Wood LD, Parsons DW, Jones S, Lin J, Sjöblom T, Leary RJ, Shen D, Boca SM, Barber T, Ptak J, Silliman N, Szabo S, Dezso Z, Ustyanksky V, Nikolskaya T, Nikolsky Y, Karchin R, Wilson PA, Kaminker JS, Zhang Z et al (2007) The genomic landscapes of human breast and colorectal cancers. *Science* **318**: 1108-13
